# Supplementary material for: A two-site flexible clamp mechanism for RET-GDNF-GFRα1 assembly reveals both conformational adaptation and strict geometric spacing
Source: PubMed Central journal article supplement (PMC8266384; doi:10.1016/j.str.2020.12.012), 2021-07-01
Supplement: mmc1.pdf [file mmc1.pdf]

**Structure, Volume 29**

**Supplemental Information**

**A two-site flexible clamp mechanism  
for RET-GDNF-GFR $\alpha$ 1 assembly reveals both  
conformational adaptation and strict geometric spacing**

**Sarah E. Adams, Andrew G. Purkiss, Phillip P. Knowles, Andrea Nans, David C. Briggs, Annabel Borg, Christopher P. Earl, Kerry M. Goodman, Agata Nawrotek, Aaron J. Borg, Pauline B. McIntosh, Francesca M. Houghton, Svend Kjær, and Neil Q. McDonald**

## SUPPLEMENTARY FIGURES

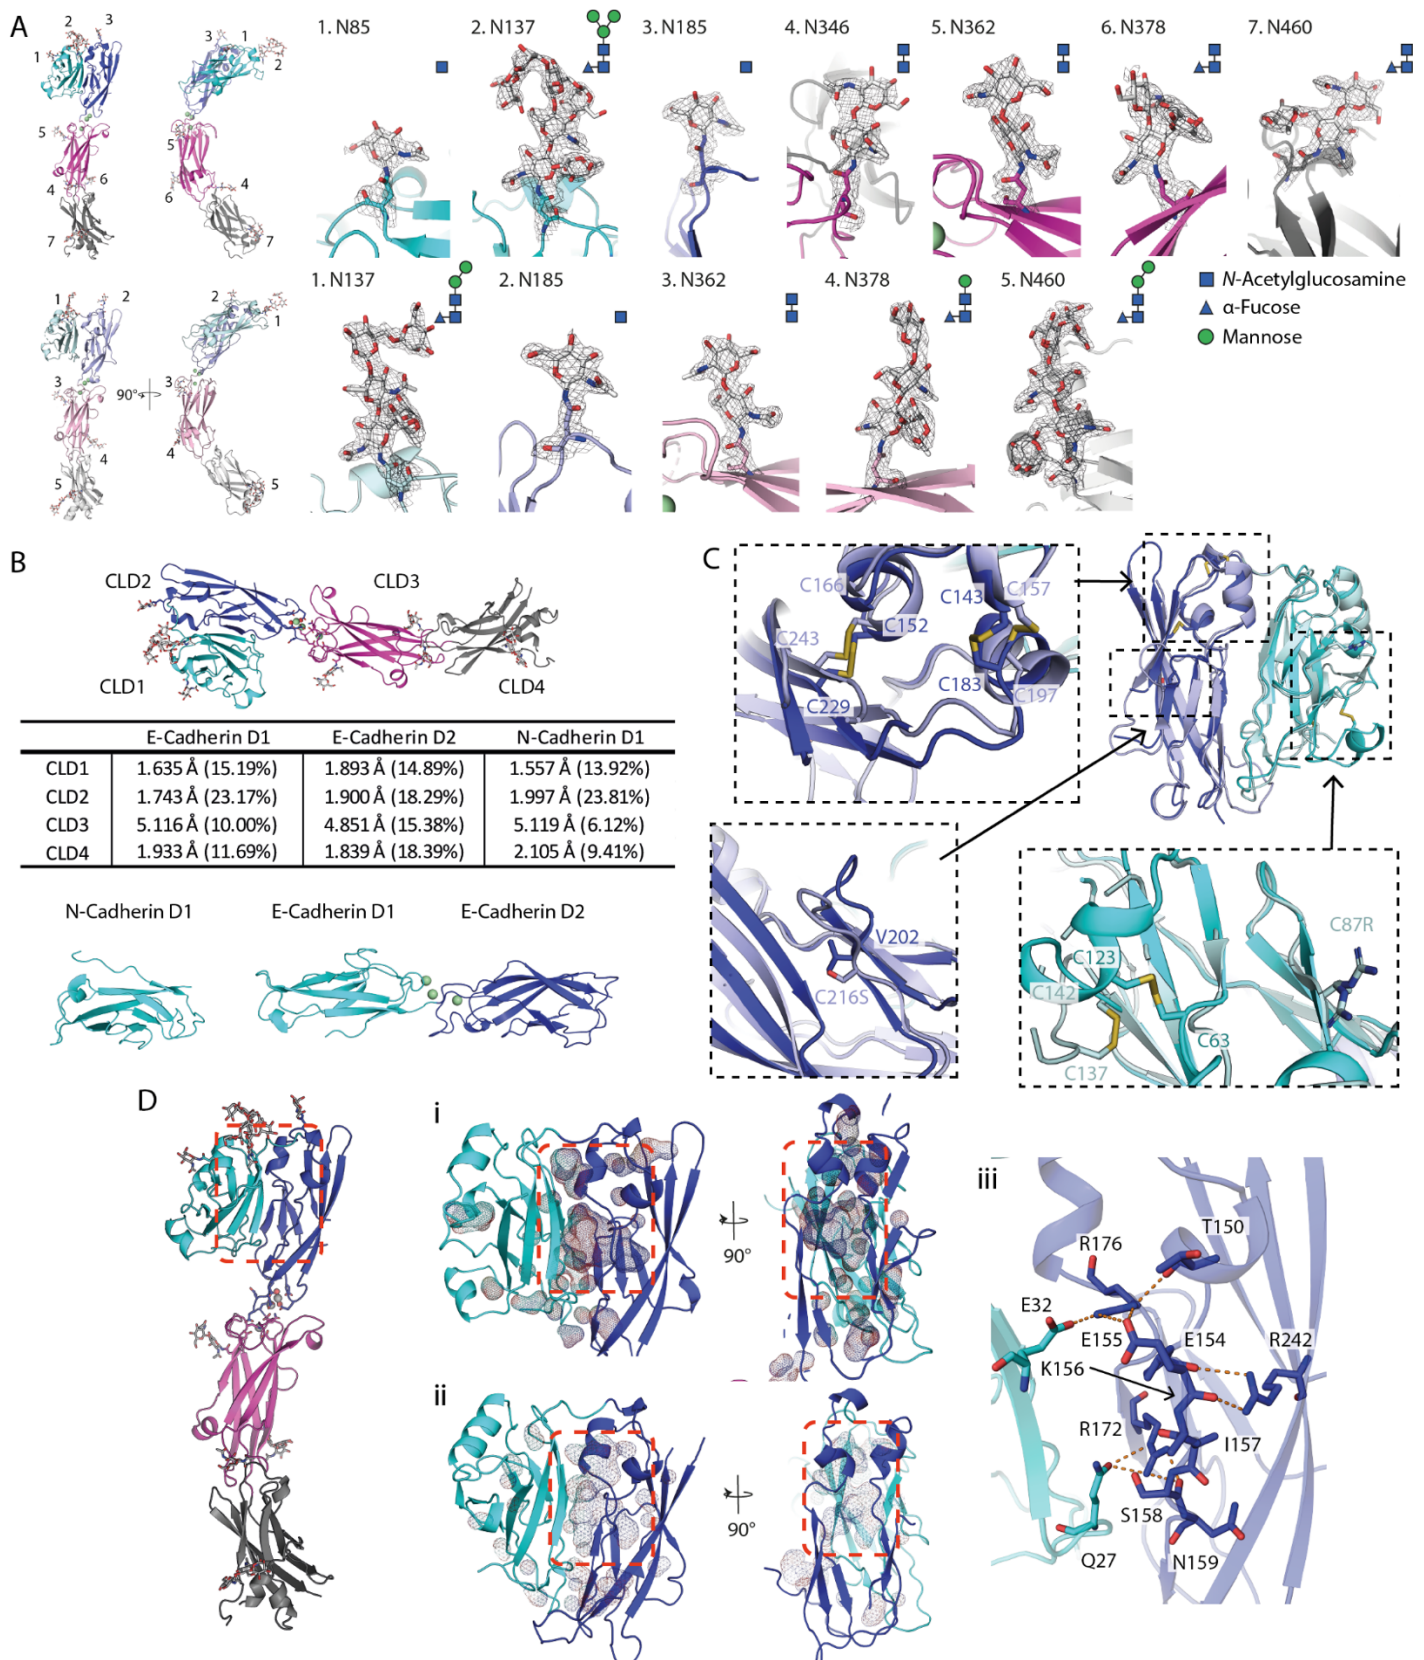

**Supplementary Figure 1: Structural analysis of human RET CLD1-4<sup>red.sug.</sup>** A) Asparagine-linked sites (N-linked) within the zRET<sup>CLD1-4</sup> module and final electron density map calculated using m2Fo-DFc coefficients contoured at 1.0  $\sigma$  corresponding to each N-linked glycosylation site are shown. B) Calculated RMSD values (and sequence identity) between each of the cadherin like domains from zCLD1-4<sup>red.sug.</sup> and E-cadherin domains 1 and 2 (PDB 1EDH)(Nagar et al., 1996) and N-cadherin domain 1 (PDB 1NCI)(Shapiro et al., 1995). C) Disulfide swapping evident between higher and lower vertebrates; zCLD1-2 (in cyan and blue) aligned with the hCLD12 structure (in pale cyan and pale blue, PDB 2X2U), with close-ups of the cysteine within the structure. The two unpaired cysteines unique to hRET were mutated to arginine (C87R) and a serine (C216S) to aid structure determination of hRET<sup>CLD1-2</sup> (Kjær et al., 2010). D) Analysis of the zCLD1-2 clamshell interface; orthogonal views of the cavity (shown in mesh) within CLD1-2 for both zebrafish (i) and human (ii) (PDB 2X2U)(Kjær et al., 2010). (iii) The residues incorporated into the CLD1-2 clamshell interface; CLD2- $\beta$ 1 stabilised with R242 (CLD2- $\beta$ 6), R172 and R176 (CLD2- $\beta$ 2) the latter of which also interact with Q27 and E32 (CLD1- $\beta$ 1). In all cases the structures are represented as a cartoon and the residues are represented as sticks with individual domains are coloured as follows; CLD1 in cyan, CLD2 in blue, CLD3 in magenta and CLD4 in grey. All images were rendered in PyMOL (Schrodinger, 2015). Related to Figure 1.

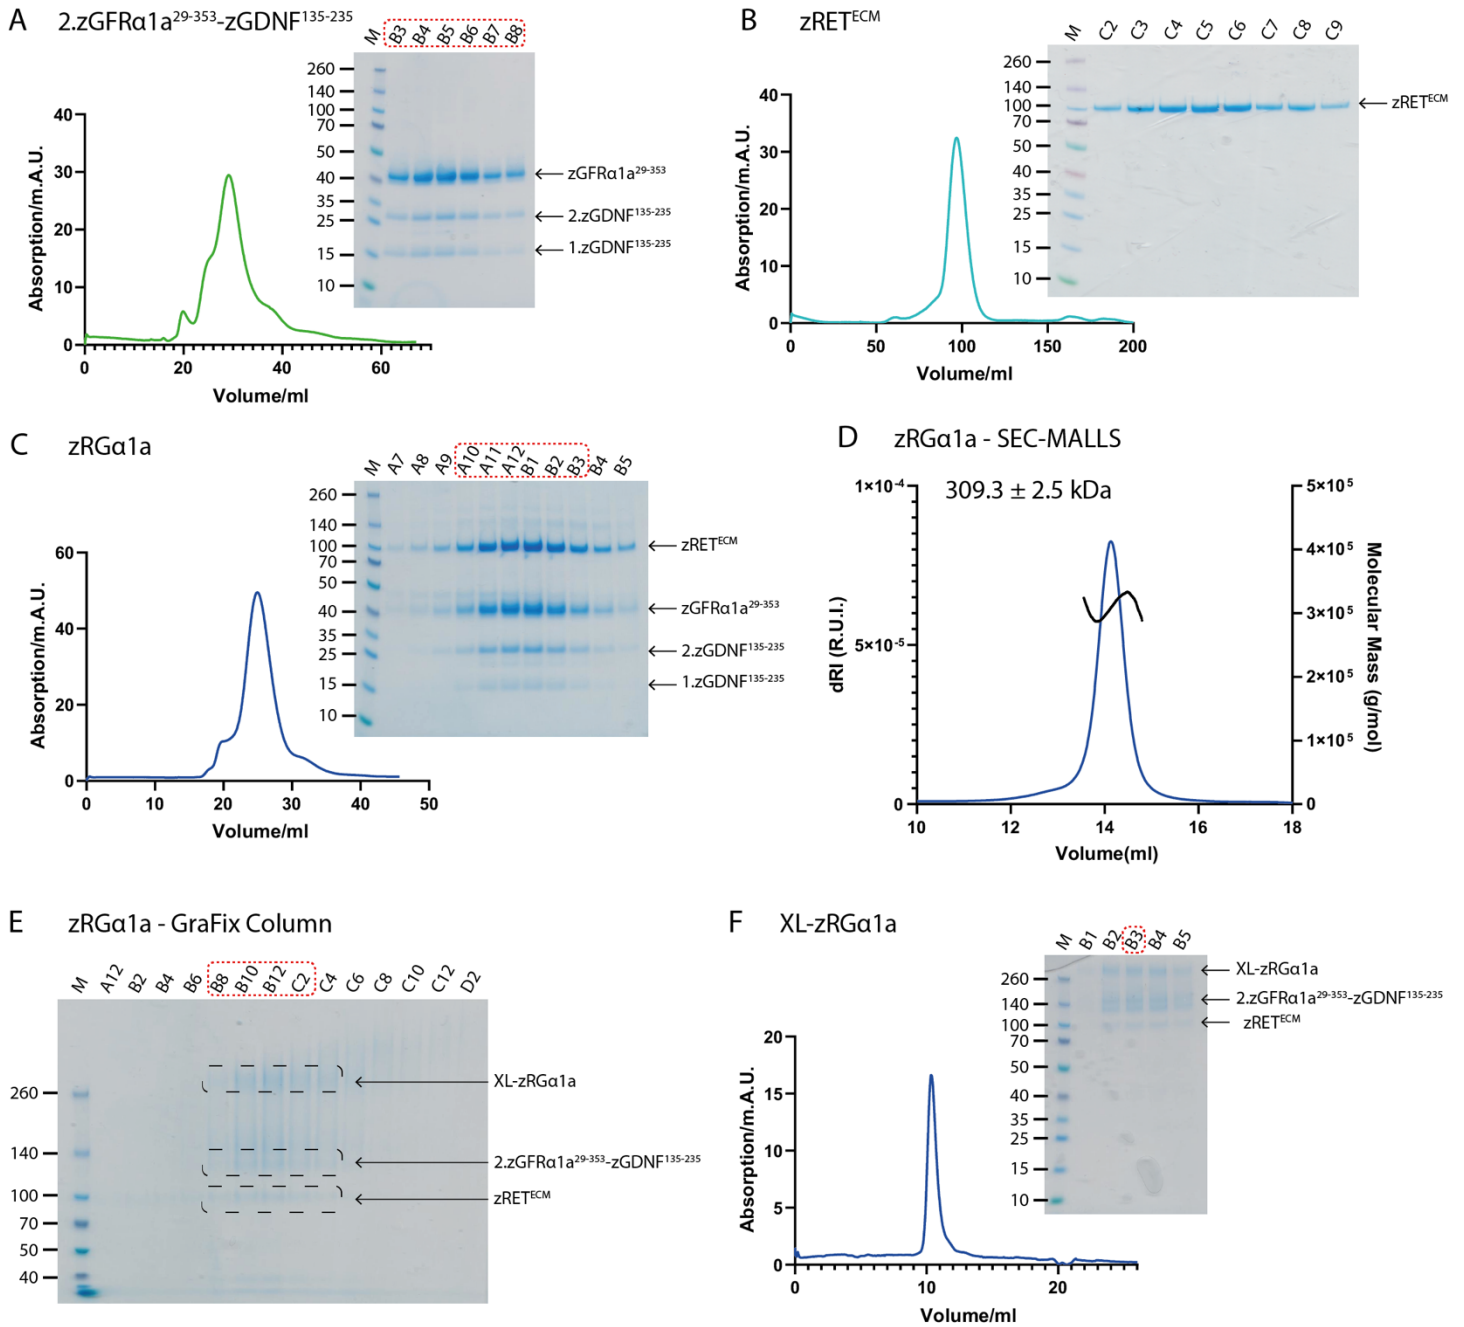

**Supplementary Figure 2: Purification of individual zRG $\alpha$ 1a components and crosslinking of the zRG $\alpha$ 1a ternary complex.** Size exclusion profiles of A) 2.zGFR $\alpha$ 1a<sup>29-353</sup>-zGDNF<sup>135-235</sup>, B) zRET<sup>ECM</sup> (shown here as zRET<sup>ECM</sup> for extracellular module) and C) zRG $\alpha$ 1a D) SEC-MALLS trace of the purified zRG $\alpha$ 1a E) SDS-PAGE of fractionated GraFix stabilised zRG $\alpha$ 1a sample. F) Size exclusion profile of the crosslinked zRG $\alpha$ 1a sample. Related to STAR methods.



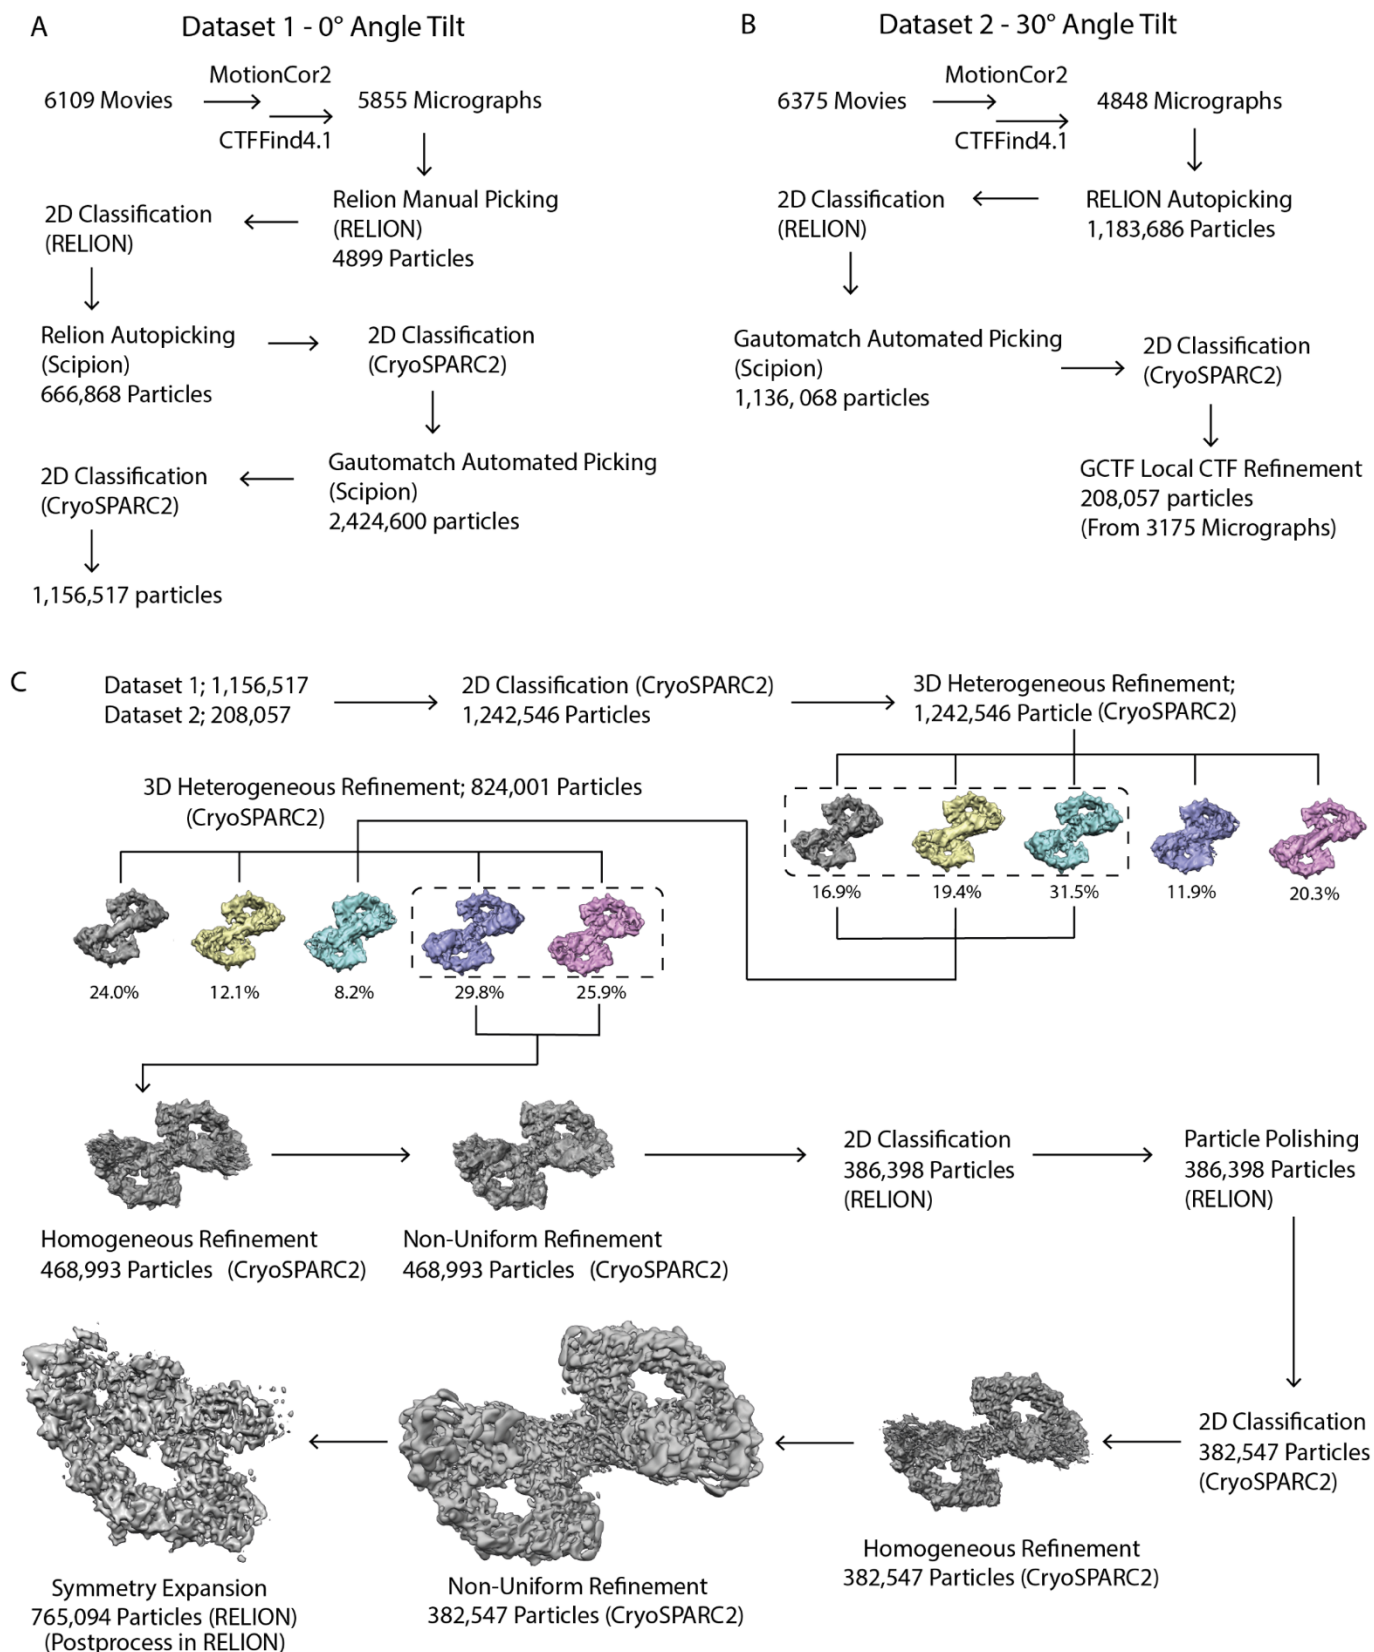

**Supplementary Figure 3: zRGα1a cryo-EM data processing workflow.** A) Non-tilted particles dataset 1 and B) tilted particles dataset 2 were processed independently. C) Combined particles from both datasets 1 and 2 and workflow. Software packages used; CryoSPARC2 (Punjani et al., 2017), CTFFind4.1 (Rohou and Grigorieff, 2015), Gautomatch [K. Zhang, MRC LMB ([www.mrc-lmb.cam.ac.uk/kzhang/](http://www.mrc-lmb.cam.ac.uk/kzhang/))], GCTF (Zhang, 2016), MotionCor2 (Zheng et al., 2017) RELION (Kimanius et al., 2016; Scheres, 2012; Zivanov et al., 2018), Scipion (de la Rosa-Trevin et al., 2016), Related to Figure 2.

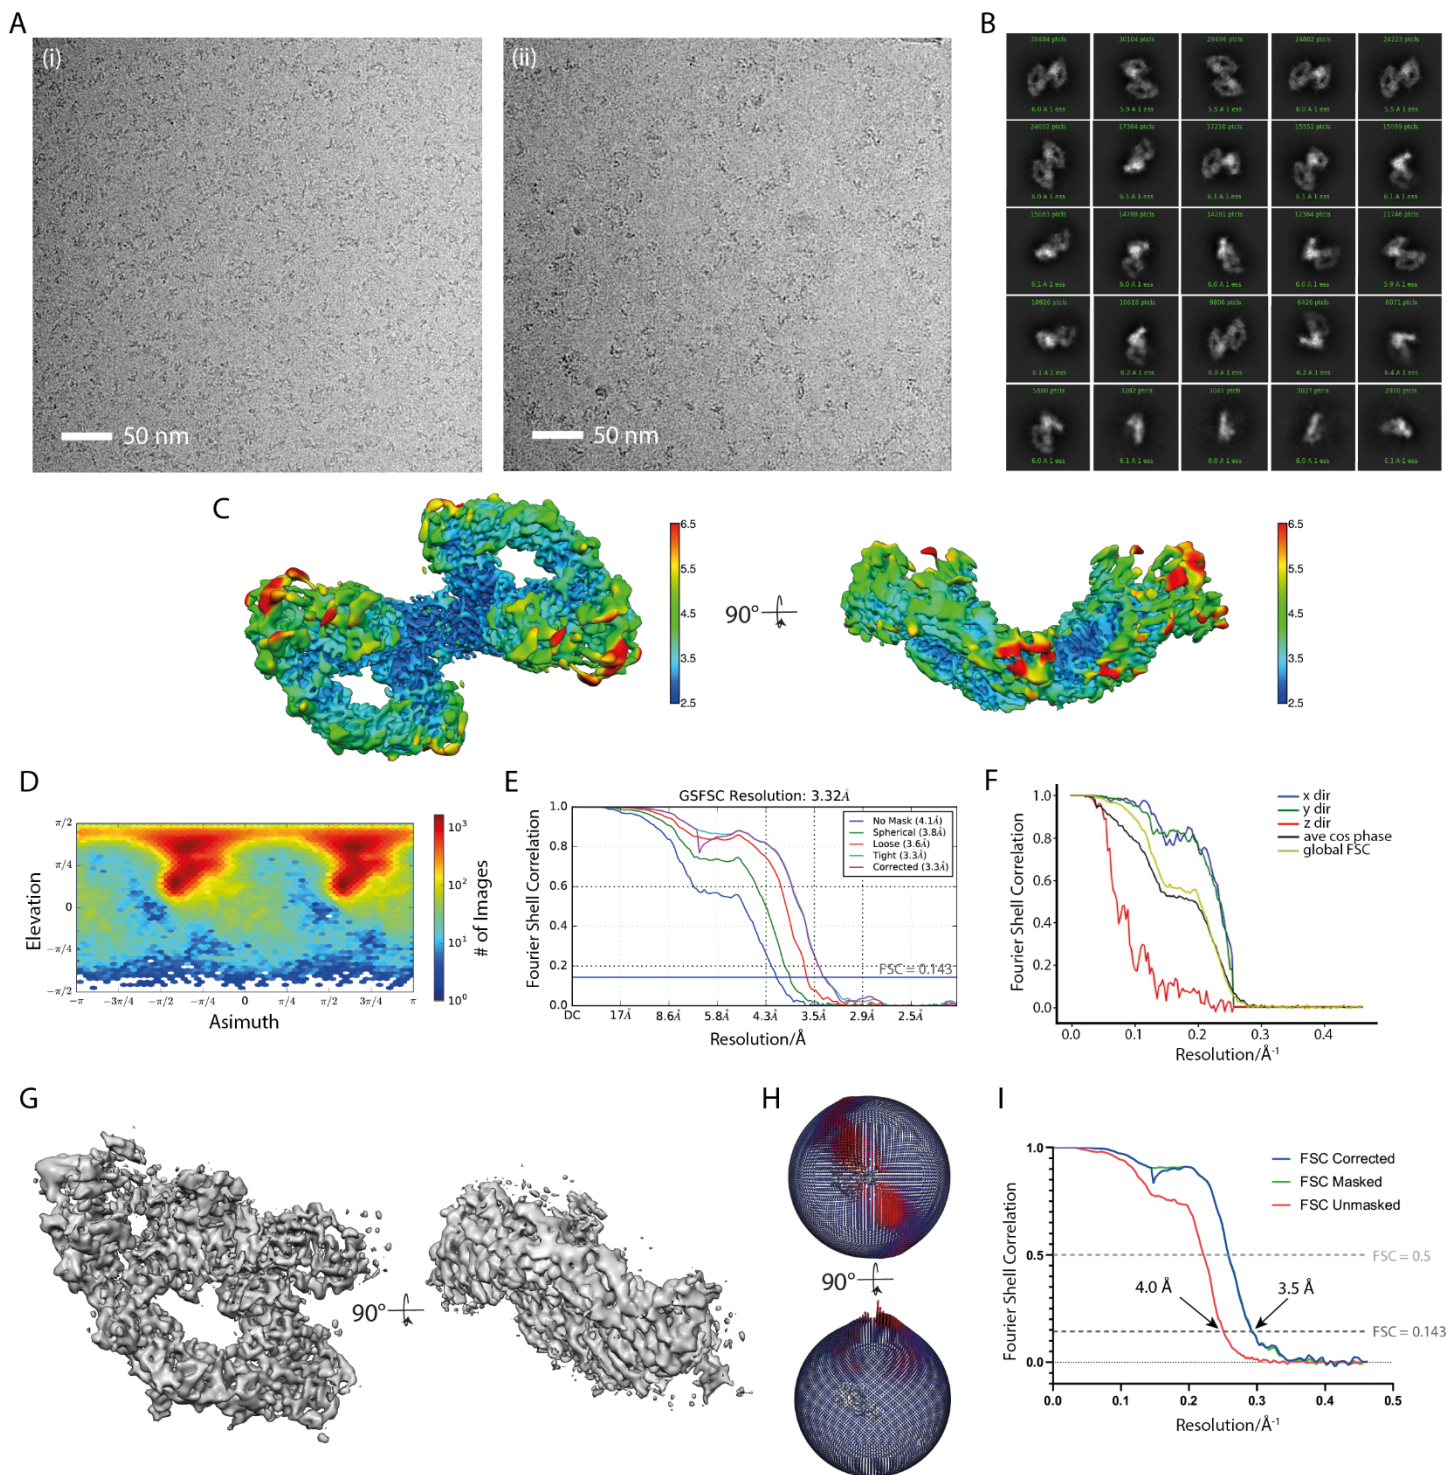

**Supplementary Figure 4: zRG $\alpha$ 1a single particle cryo-EM reconstruction.** A) Representative micrographs from the non-tilted dataset (i) and the dataset collected with a tilt angle of 30° (ii). B) Twenty-five 2D class averages from all the particles in the final reconstruction. C) The C2 averaged cryo-EM map is coloured by local resolution and was generated by the locRes option in CryoSPARC2 (Punjani et al., 2017) using blue for 2.5 Å resolution areas, green for 4.5 Å and red for 6.5 Å resolution. A total of 382,574 particles were generated using CryoSPARC2 (Punjani et al., 2017), non-uniform refinement and postprocessed in RELION (Kimanius et al., 2016; Scheres, 2012; Zivanov et al., 2018). Two orthogonal views of the zRG $\alpha$ 1a complex are shown. D) Angular distribution of the particles in the C2 averaged map. E) Fourier shell correlation curve of the C2 averaged map. F) A 3DFSC (Tan et al., 2017) plot generated from the C2 averaged map. G) Two views orthogonal of the symmetry expanded map, generated using particles expansion in RELION (Kimanius et al., 2016; Scheres, 2012; Zivanov et al., 2018). H) Two orthogonal views of the angular distribution from the symmetry expanded map. I) The Fourier shell correlation curves from the symmetry expanded map showing an overall resolution of 3.5 Å. Images of the maps were rendered using Chimera (Pettersen et al., 2004). Related to Figure 2.



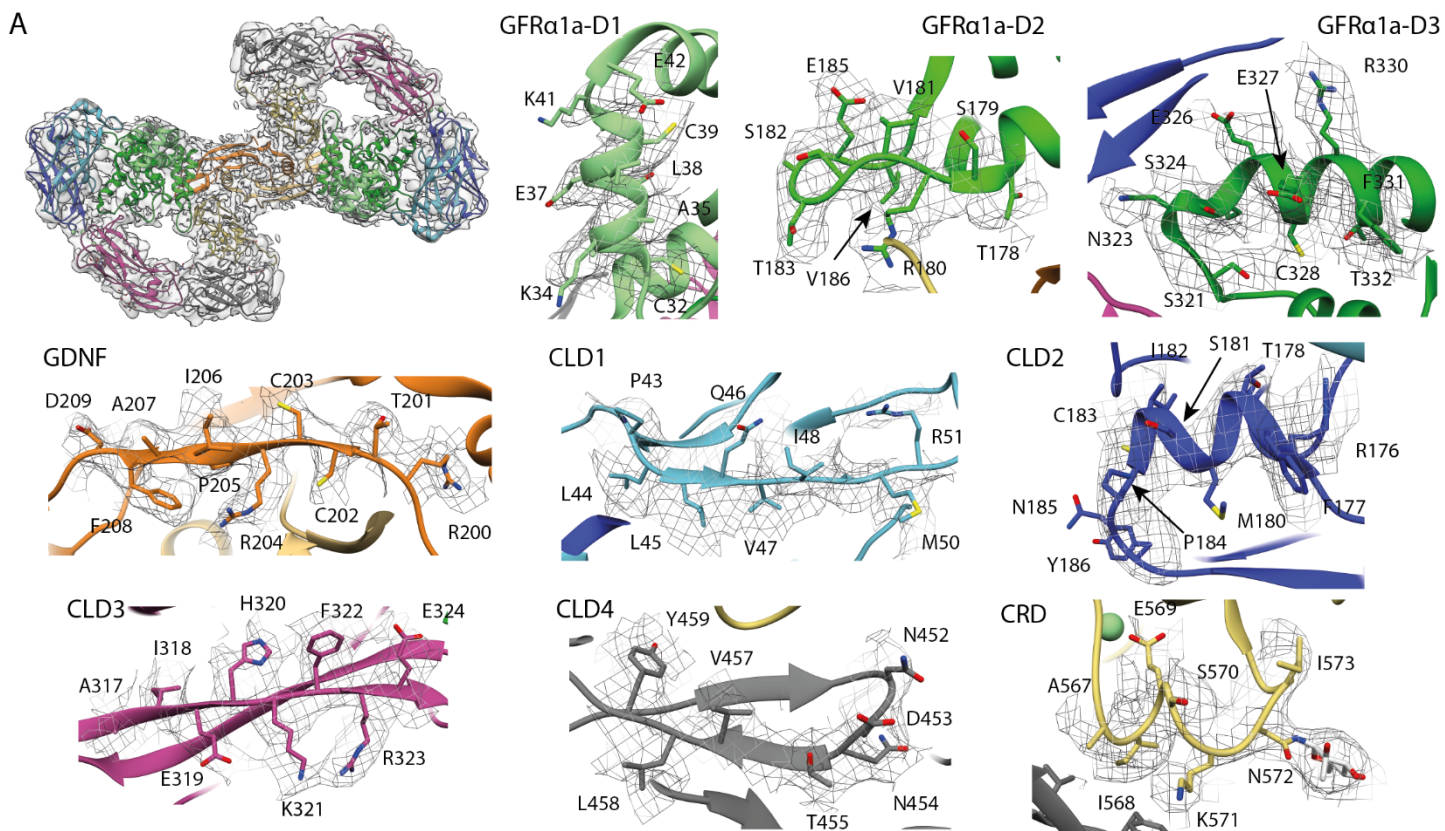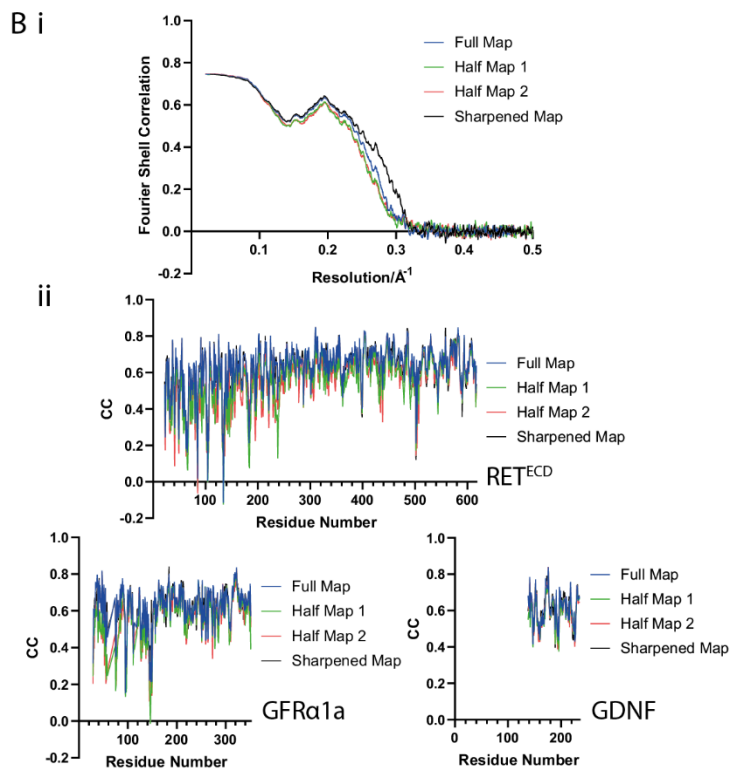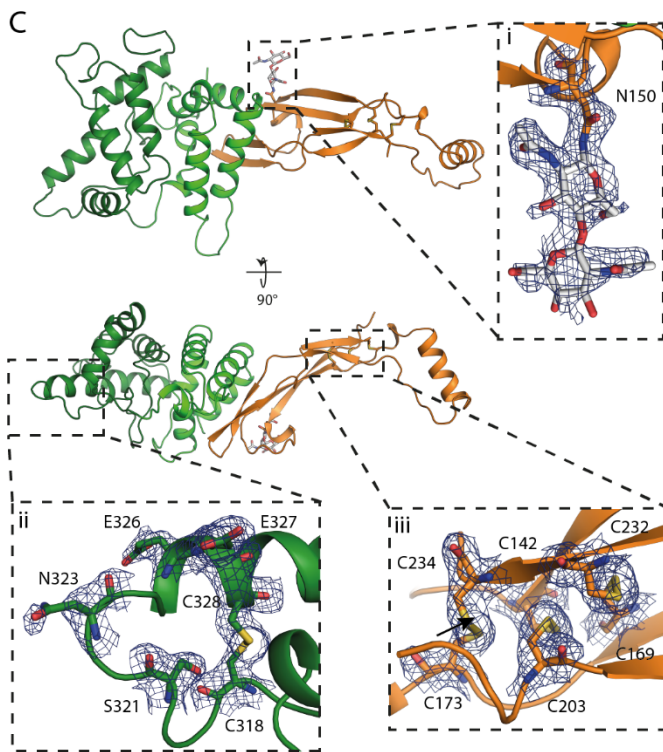

**Supplementary Figure 5: Cryo-EM map to zRGα1a model correlation and electron density map quality for zGDNF<sup>138-235</sup>-zGFRα1a<sup>151-353</sup> structure** A) The C2 averaged map and model with sections of each domain highlighted. The residues are represented as sticks and the mainchain as ribbon, the maps are shown as mesh. B) (i) Map-to-model Fourier shell correlation between the C2 averaged cryo-EM map and the zRGα1a model. (ii) Cross correlation between each residue in the model and the C2 averaged map. Correlation statistics were provided with the use of the full maps and two half maps in each case using Phenix cryo-EM model validation tools (Afonine et al., 2018). C) Final 2.2 Å zGDNF-zGFRα1a structure showing the crystallographic asymmetric unit contains a single copy of zGDNF<sup>138-235</sup>-zGFRα1a<sup>151-353</sup>. The insets reveal the final electron density calculated for different areas of the structure using m2Fo-DFc coefficients and contoured at 1.0  $\sigma$ . The glycosylation site located on N150 of GDNF (i), the binding site of zGFRα1a that interacts with RET CLD(2-3) calcium site (ii), and the disulfide bond network in zGDNF (iii). Images were rendered in Chimera (Pettersen et al., 2004) or PyMOL (Schrodinger, 2015). Related to Figure 2.

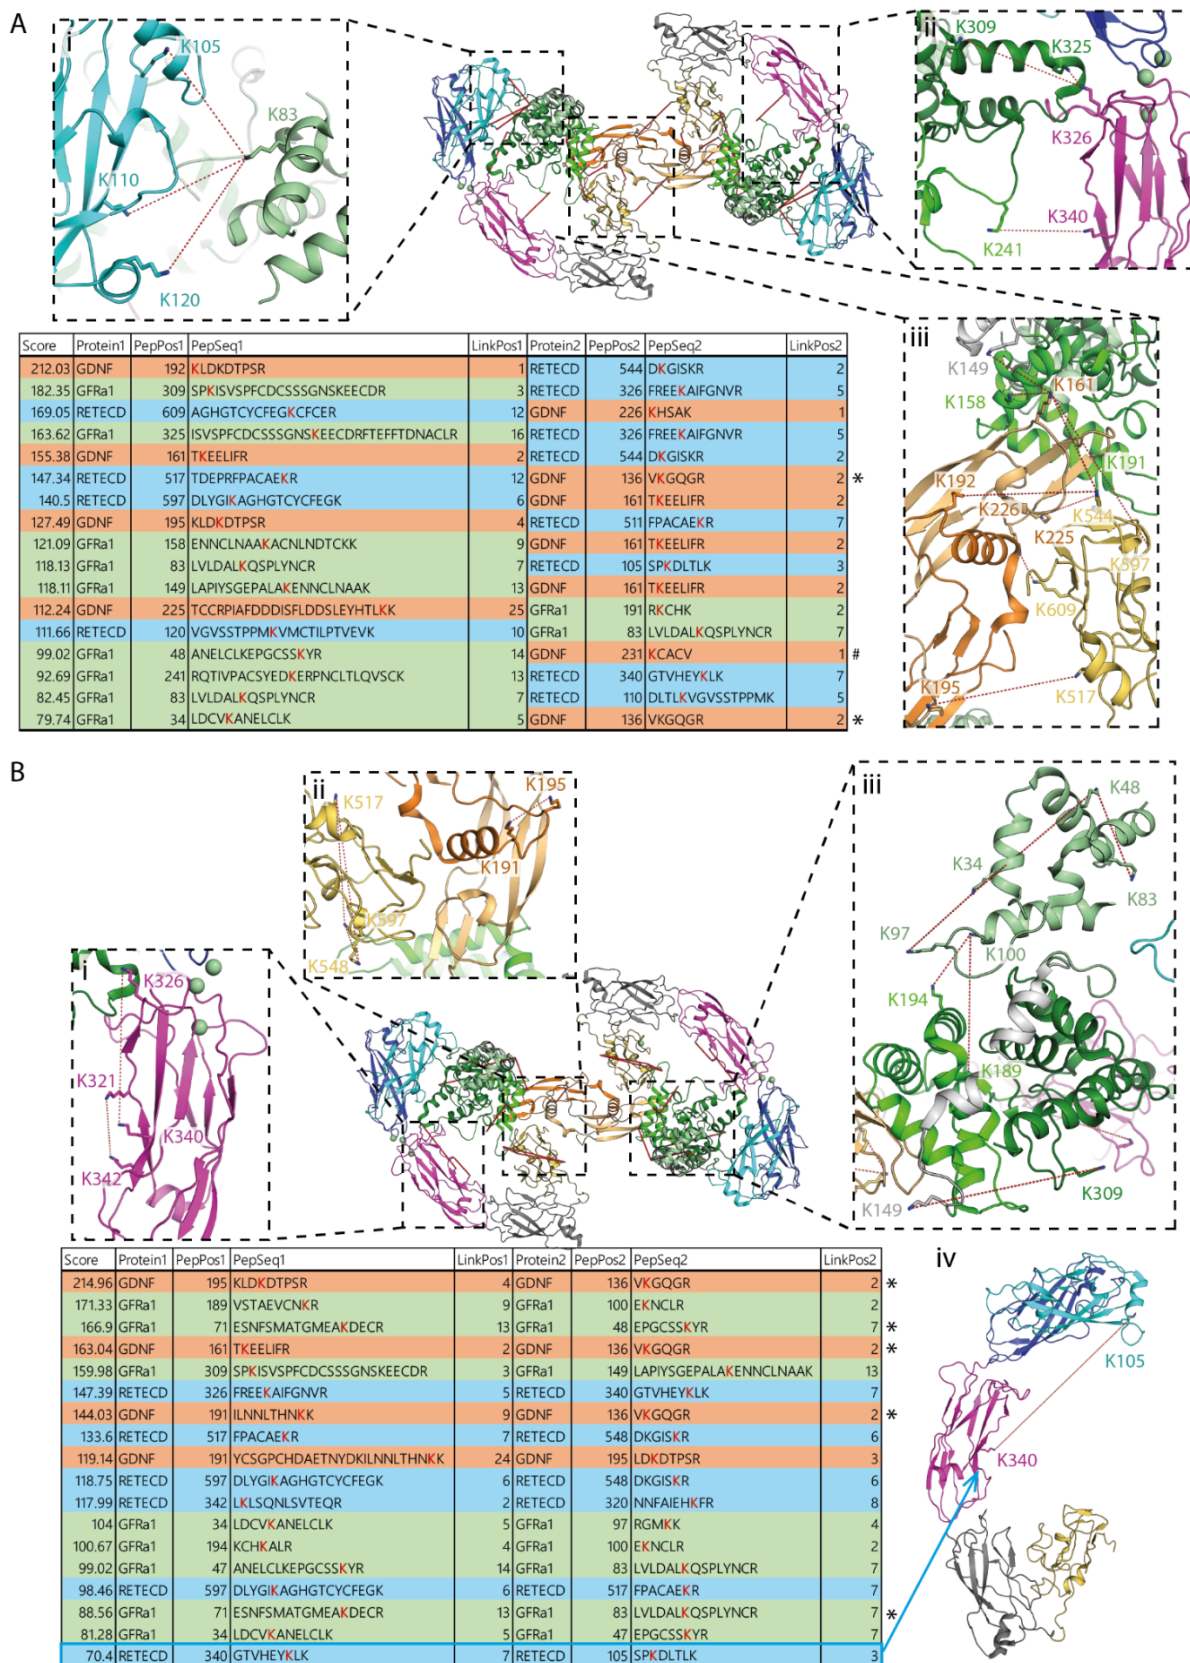

**Supplementary Figure 6: Mapping interactions within the zRGα1 complex by XL-MS (Cross-Linking Mass Spectrometry).** A) Intermolecular crosslinks identified between lysine side-chains from RET<sup>ECD</sup>, zGFRα1<sup>D1-D3</sup> and zGDNF<sup>mat</sup> highlighted in the C2 zRGα1 model, close-ups of the residues in the insets; RET<sup>CLD1</sup>-zGFRα1<sup>D1</sup> (i), RET<sup>CLD3</sup>-zGFRα1<sup>D3</sup> (ii) and RET<sup>CRD</sup>-zGFRα1<sup>D2</sup>-zGDNF<sup>mat</sup> (iii). B) Intramolecular crosslinks between lysine side-chains from RET<sup>ECD</sup>, zGFRα1<sup>D1-D3</sup> and zGDNF<sup>mat</sup> highlighted in the C2 zRGα1 model, close-ups of the residues in the insets; RET<sup>CLD3</sup> (i), RET<sup>CRD</sup>/zGDNF<sup>mat</sup>. (ii) zGFRα1<sup>D1-D3</sup> (iii). (iv) Shows an intramolecular crosslink between CLD1 and CLD3 indicating flexibility at the calcium binding site. The crosslinked peptides highlighted with \* do not have any structural model therefore are not shown in the model. The crosslinked peptide highlighted with # represents domain 1 of zGFRα1a cross-linked to zGDNF which has a distance of ~59 Å. This may indicate that zGFRα1<sup>D1</sup> is quite mobile consistent with the poorer quality of the map for this domain. The overall C2 zRGα1a model is represented as a cartoon with the crosslinks formed between lysines using disuccinimidyl sulfoxide (DSSO) represented as red lines between crosslinked lysines represented as sticks. The model is coloured according to its domains; CLD1 in cyan, CLD2 in blue, CLD3 in magenta, CLD4 in grey, CRD in yellow, zGFRα1<sup>D1</sup> in pale green, zGFRα1<sup>D2</sup> in green, zGFRα1<sup>D3</sup> in dark green and zGDNF in orange. All images were rendered in PyMOL (Schrodinger, 2015). Related to STAR methods.



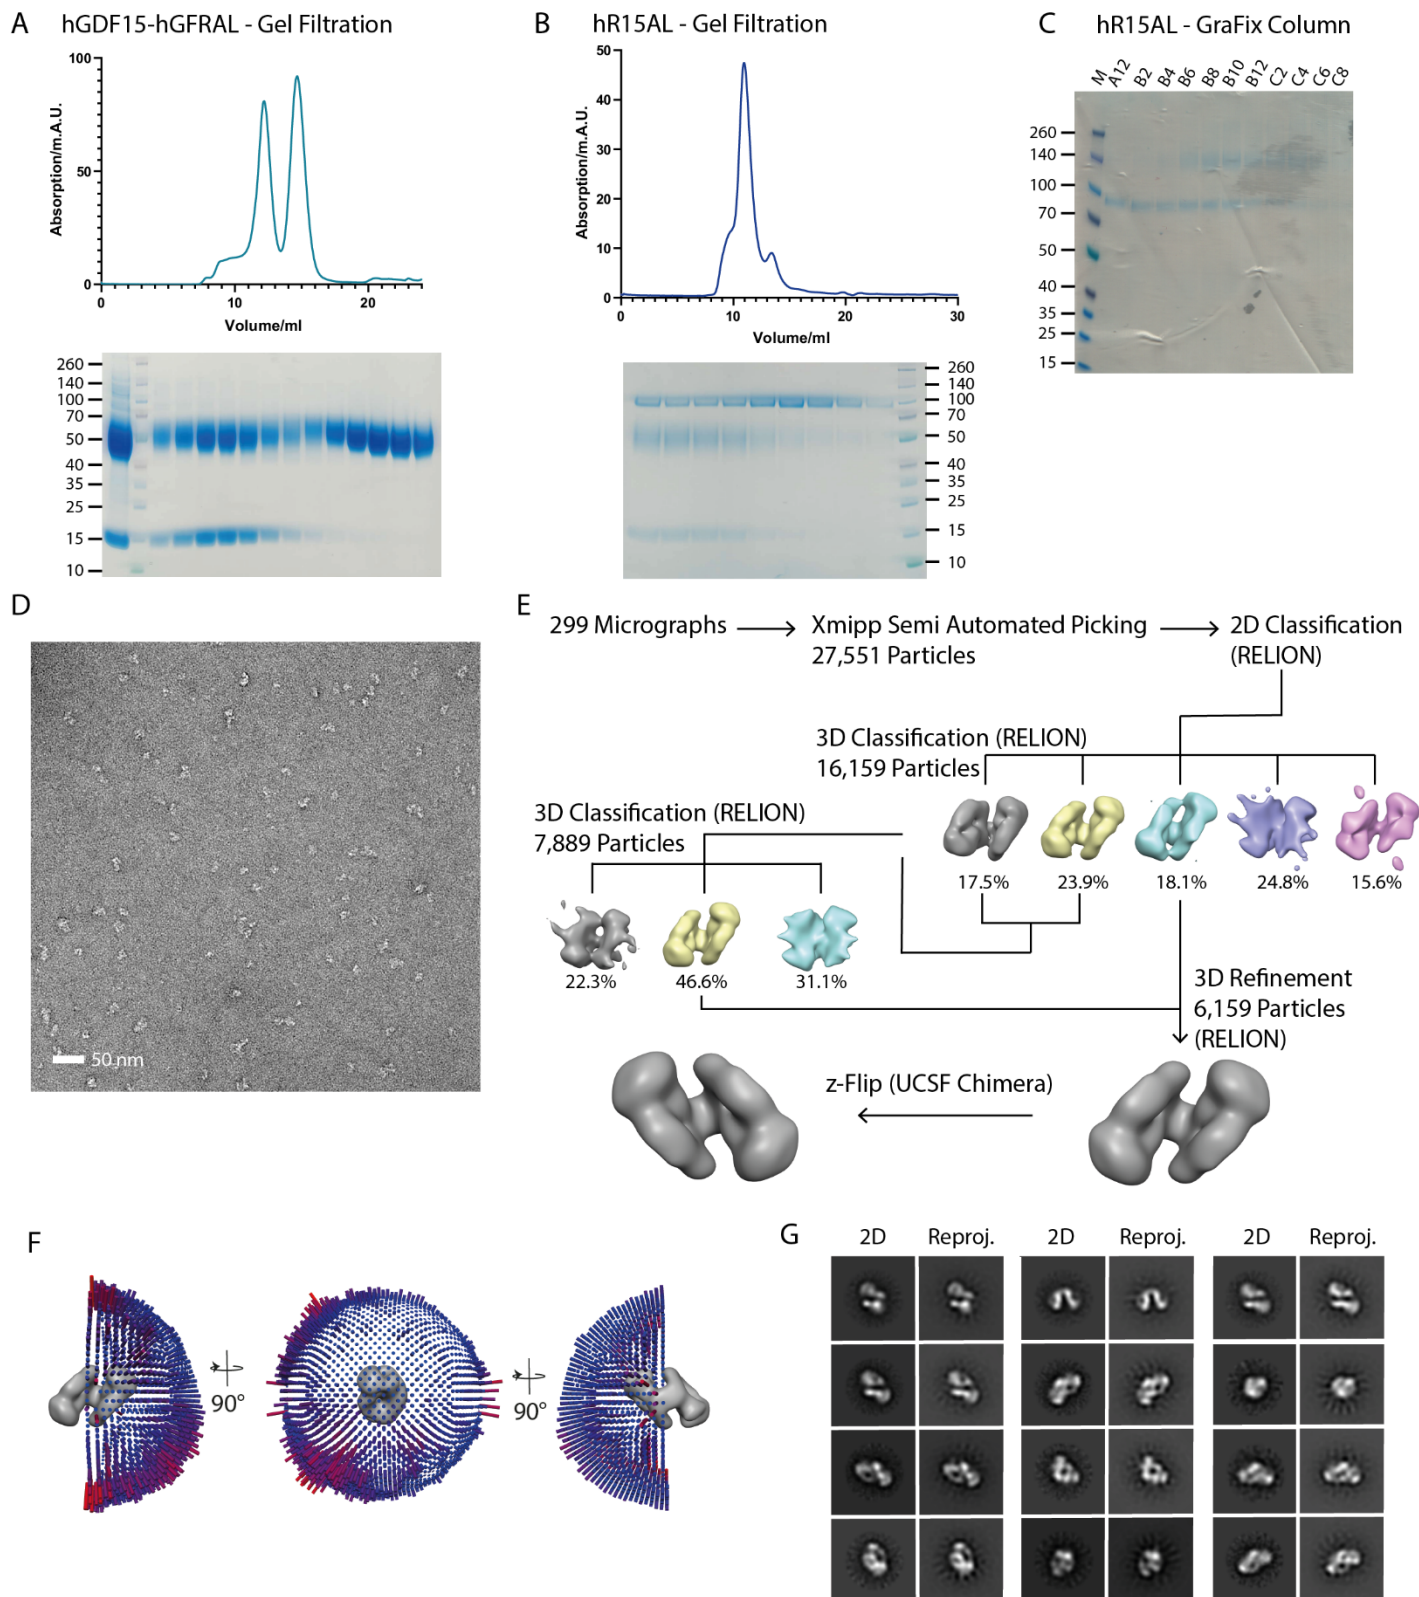

**Supplementary Figure 7: hR15AL sample preparation and EM data processing.** Size exclusion profiles and Coomassie-stained SDS-PAGE gels of A) hGDF15-hGFRAL and B) hRET-hGDF15-hGFRAL (hR15AL). C) fractions from the GraFix (Gradient Fixation) of hR15AL. D) A representative negative stain micrograph of the hR15AL-XL complex. E) The data processing pipeline leading to the final negative stain envelope of hR15AL. F) The particle distribution in the negative stain envelope with C2 symmetry applied. G) Projection matching, performed using Xmipp projection match (De la Rosa-Trevín et al., 2013), between the RELION (Kimanius et al., 2016; Scheres, 2012; Zivanov et al., 2018) showing 2D class averages from the particles that comprise the final reconstruction and different views of the 3D envelope. Related to Figure 6.

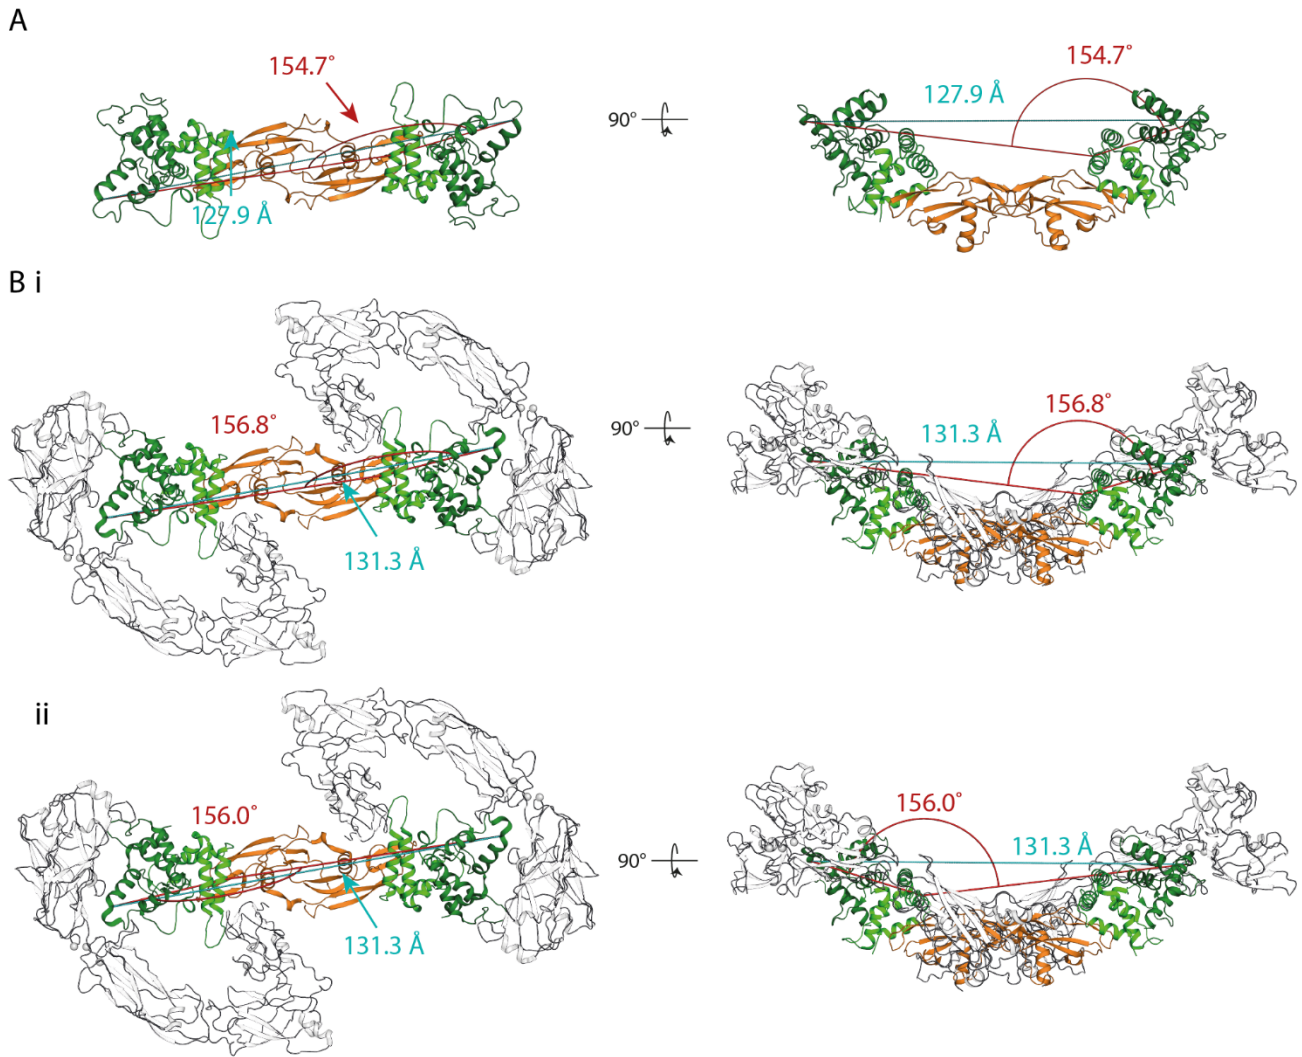

**Supplementary Figure 8: Evidence for limited conformational flexing of zGDNF-zGFR $\alpha$ 1a in the presence or absence of zRET<sup>ECD</sup>.** A) The crystal structure of a 2:2 zGDNF-zGFR $\alpha$ 1a is shown as a cartoon, with GDNF in light orange, zGFR $\alpha$ 1a<sup>D2</sup> in light green and zGFR $\alpha$ 1a<sup>D3</sup> in green. The distance between K325 from symmetry-related molecules of zGFR $\alpha$ 1a is highlighted in cyan and the angle between the K325-A172 from one molecule of zGFR $\alpha$ 1 and K325 in the second molecule of zGFR $\alpha$ 1a in red. B) 2:2 ligand:co-receptor zGDNF-zGFR $\alpha$ 1a<sup>D2-D3</sup> built into the cryo-EM zRG $\alpha$ 1a structure, represented as a cartoon, with zGFR $\alpha$ 1a<sup>D2</sup>, zGFR $\alpha$ 1a<sup>D3</sup> and zGDNF in green, forest green and orange, respectively, and zRET<sup>ECD</sup> in grey. The distance between K325 from symmetry-related molecules of zGFR $\alpha$ 1a highlighted in cyan and the angle between the K325-A172 from one molecule of zGFR $\alpha$ 1 and K325 in the second molecule of zGFR $\alpha$ 1a in red, there are two angles calculated using these residues in the C2 averaged structure highlighted in parts (i) and (ii) of the figure. All images were rendered in PyMOL (Schrodinger, 2015). Related to Figure 4.



## SUPPLEMENTARY TABLES

|                    | LIGAND |       |       |        | CO-RECEPTOR     |                 |                 |        | RET  |       |
|--------------------|--------|-------|-------|--------|-----------------|-----------------|-----------------|--------|------|-------|
|                    | zGDNF  | hGDNF | hNRTN | hGDF15 | zGFR $\alpha$ 1 | hGFR $\alpha$ 1 | hGFR $\alpha$ 2 | hGFRAL | zRET | hRET  |
| <b>LIGAND</b>      |        |       |       |        |                 |                 |                 |        |      |       |
| zGDNF              | 1530Å  |       |       |        | 866Å            |                 |                 |        | 347Å |       |
| zGDNF*             |        |       |       |        |                 |                 |                 |        | 251Å |       |
| hGDNF              |        | 1003Å |       |        |                 | 961Å            |                 |        |      | 187Å  |
| hGDNF*             |        |       |       |        |                 |                 |                 |        |      | 148Å  |
| hNRTN              |        |       | 2006Å |        |                 |                 | 843Å            |        |      | 296Å  |
| hNRTN*             |        |       |       |        |                 |                 |                 |        |      | 218Å  |
| hGDF15             |        |       |       | 1398Å  |                 |                 |                 | 577Å   |      | 407Å  |
| hGDF15*            |        |       |       |        |                 |                 |                 |        |      | 369Å  |
| <b>CO-RECEPTOR</b> |        |       |       |        |                 |                 |                 |        |      |       |
| zGFR $\alpha$ 1    |        |       |       |        |                 |                 |                 |        | 846Å |       |
| hGFR $\alpha$ 1    |        |       |       |        |                 |                 |                 |        |      | 872Å  |
| hGFR $\alpha$ 2    |        |       |       |        |                 |                 |                 |        |      | 960Å  |
| hGFRAL             |        |       |       |        |                 |                 |                 |        |      | 1094Å |

Interface sizes (averaged over both protomers) calculated by PDBePISA

\* Contact surface to the second protomer of GFL dimer

**Supplementary Table 1: Major interface sizes for ternary complexes of hRET/zRET, GFR $\alpha$ 1/ $\alpha$ 2/GFRAL and GDNF/NRTN/GDF15. Related to STAR methods.**

## SUPPLEMENTARY DOCUMENT S1

### *XL-MS analysis of the zRET<sup>ECD</sup>-GFR $\alpha$ 1-GDNF complex:*

All chemicals were purchased from Sigma at the highest purity unless otherwise stated. A total of 200 ng protein in 20 mM HEPES (pH 7.5), 150 mM NaCl, 1 mM CaCl<sub>2</sub> was cross-linked using 1 mM disuccinimidyl sulfoxide (DSSO)(Kao et al., 2011) (Thermo Fisher Scientific) with mild shaking for 15 min at 37 °C. The reaction was quenched using a final concentration of 5% hydroxylamine for a further 15 min at 37 °C. The sample was subsequently alkylated, reduced and proteolysed. To do this, the sample was dried to completion using vacuum centrifugation and resolubilised with sonication into 8 M urea. Cysteine reduction was carried out using 2.5 mM TCEP for 30 min at 37 °C and alkylated in the dark using 5 mM iodoacetamide at room temperature for 30 min. The urea was diluted to 1 M using 50 mM triethylammonium bicarbonate and proteins were proteolysed using trypsin (Pierce) at 1:50 w/w trypsin:protein overnight at 37 °C. The solution was acidified to pH 2-3 using trifluoroacetic acid (TFA) and desalted using in house built STAGE tips made using Empore SPE C18 disks (3M, 66883-U). The eluent was then dried to completion.

### *Liquid Chromatography Mass Spectrometry*

Peptides were reconstituted in 0.1 % TFA (v/v) and chromatographically resolved using an Ultimate 3000 RSLCnano (Dionex) HPLC. Peptides were first loaded onto an Acclaim PepMap 100 C18, 3  $\mu$ m particle size, 100 Å pore size, 20 mm x 75  $\mu$ m ID (Thermo Scientific, 164535) trap column using a loading buffer (2 % acetonitrile (MeCN) (v/v) and 0.05 % TFA in 97.95 % H<sub>2</sub>O) with a flow rate of 7  $\mu$ L/min. Chromatographic separation was achieved using an EASY-Spray column, PepMap C18, 2  $\mu$ m particles, 100 Å pore size, 500 mm x 75  $\mu$ m ID (Thermo Scientific, ES803). The gradient utilised a flow of 0.275  $\mu$ L/min, starting at 98 % mobile A (0.1% formic acid, 5 % dimethyl sulfoxide (DMSO) in H<sub>2</sub>O) and 2 % mobile B (0.1 % formic acid, 75 % MeCN, 5% DMSO and 19.9 % H<sub>2</sub>O). After 3 min mobile B was increased to 8 % over 3 min, increased to 25 % over 69 min, to 45 % over 35 min, further increased to 90% in 17 min and held for 5 min. Finally, mobile B was reduced back to 5 % over 3 min for the rest of the acquisition.

MS1 data were acquired in real time over 150 minutes using an Orbitrap Fusion Lumos Tribrid mass spectrometer in positive, top speed mode with a cycle time of 5 s. The chromatogram (MS1) was captured using 60,000 resolution, a scan range of 375-1500 with a 50 ms maximum injection time, and 4e5 AGC target. MS2 dynamic exclusion with repeat count 2, exclusion duration of 30 s, 20 ppm tolerance window was used, along with isotope exclusion, a minimum intensity exclusion of 2e4, charge state inclusion of 3-8 ions and peptide mono isotopic precursor selection. Precursors within a 1.2  $m/z$  isolation window were then fragmented using 25 % normalised collision-induced dissociation (CID), 100 ms maximum injection time and 5 e4 AGC target. Scans were recorded using 30,000 resolution in centroid mode starting 120  $m/z$ . MS3 spectra containing peaks with a mass difference of 31.9721 Da were further fragmented with a 43 % normalised higher collision induced dissociation, using a 2  $m/z$

isolation window, 150 ms maximum injection time and 2e4 AGC target. 4 scans were recorded using an ion trap detection in rapid mode starting at 120  $m/z$ .

#### *Data analysis.*

Data processing was carried out using Proteome Discoverer Version 2.3 (ThermoFisher Scientific) with the XlinkX node(2017; Liu et al., 2015). The acquisition strategy was set to MS2\_MS3 mode. The database comprised solely of the specific zRET<sup>ECD</sup>, zGFR $\alpha$ 1a<sup>D1-3</sup> and GDNF<sup>mat.</sup> sequences. Trypsin was selected as the proteolytic enzyme allowing up to two missed cleavages with a minimal peptide length of five residues. Masses considered were in the range of 0.3-10 kDa. The precursor mass tolerance, FTMS fragment mass tolerance, and ITMS Fragment Mass Tolerance were set to 10 ppm, 20 ppm and 0.5 Da respectively. A static carbamidomethyl (+57.021 Da) modification was utilised for cysteine residues, with an additional dynamic modification for oxidation (+15.995 Da) on methionine residues. The False Discovery Rate (FDR) threshold was set to 0.05 with percolator as the strategy. The list of reported cross-linked spectral matches were manually examined and cross-links with spectra that did not contain acceptable b and y ion coverage were excluded. The reduced list was exported to crosslinkviewer.org (Combe et al., 2015) in order to graphically view the cross-links.
